# Supplementary material for: Late toxicities in locally advanced head and neck squamous cell carcinoma treated with intensity modulated radiation therapy
Source: PubMed Central journal article supplement — Radiat Oncol J. 2021 Sep 13;39(3):184–92. doi: 10.3857/roj.2020.00913 (PMC8497871; doi:10.3857/roj.2020.00913), 2021-09-13
Supplement: roj-2020-00913-suppl1.pdf [file roj-2020-00913-suppl1.pdf]

## Supplementary Materials

**Table S1.** Late toxicities and dose to OARs

| Parameter            |                            |                    | At risk | Toxicity occurred | HR         | 95% CI     | p-value |
|----------------------|----------------------------|--------------------|---------|-------------------|------------|------------|---------|
| Xerostomia           | Parotids D <sub>mean</sub> | <26 Gy (Reference) | 36      | 10                |            |            |         |
|                      |                            | ≥26 years          | 36      | 24                | 5.19       | 1.90–14.22 | 0.001   |
|                      | SMGs D <sub>mean</sub>     | <35 Gy (Reference) | 24      | 8                 |            |            |         |
|                      |                            | ≥35 Gy             | 48      | 26                | 2.36       | 0.85–6.56  | 0.099   |
| Dysphagia            | PC D <sub>mean</sub>       | <45 Gy (Reference) | 24      | 3                 |            |            |         |
|                      |                            | ≥45 Gy             | 48      | 24                | 7.0        | 1.84–26.61 | 0.004   |
|                      |                            | <50 Gy (Reference) | 34      | 6                 |            |            |         |
|                      |                            | ≥50 Gy             | 38      | 21                | 5.76       | 1.93–17.13 | 0.002   |
|                      |                            | <55 Gy (Reference) | 48      | 12                |            |            |         |
|                      |                            | ≥55 Gy             | 24      | 15                | 4.99       | 1.74–14.33 | 0.003   |
|                      | Larynx D <sub>mean</sub>   | <45 Gy (Reference) | 30      | 8                 |            |            |         |
|                      |                            | ≥45 Gy             | 42      | 19                | 2.27       | 0.82–6.24  | 0.112   |
|                      |                            | <50 Gy (Reference) | 40      | 12                |            |            |         |
|                      |                            | ≥50 Gy             | 32      | 15                | 2.05       | 0.78–5.42  | 0.144   |
|                      |                            | <55 Gy (Reference) | 49      | 14                |            |            |         |
|                      |                            | ≥55 Gy             | 23      | 13                | 3.25       | 1.15–9.11  | 0.025   |
|                      | CE D <sub>mean</sub>       | <45 Gy (Reference) | 47      | 14                |            |            |         |
|                      |                            | ≥45 Gy             | 25      | 13                | 2.55       | 0.93–6.96  | 0.067   |
|                      |                            | <50 Gy (Reference) | 60      | 20                |            |            |         |
| ≥50 Gy               |                            | 12                 | 7       | 2.80              | 0.78–9.94  | 0.111      |         |
| <55 Gy (Reference)   |                            | 67                 | 23      |                   |            |            |         |
| ≥55 Gy               |                            | 5                  | 4       | 7.65              | 0.80–72.49 | 0.076      |         |
| Treatment type       | Radical (Reference)        | 40                 |         |                   |            |            |         |
|                      | Adjuvant (post-operative)  | 32                 | 19      | 5.26              | 1.85–14.87 | 0.002      |         |
| Site                 | Pharynx                    | 39                 | 8       |                   |            |            |         |
|                      | Others                     | 33                 | 19      | 5.85              | 2.05–16.67 | 0.001      |         |
| Acute dysphagia      | Grade ≤2                   | 37                 | 16      |                   |            |            |         |
|                      | Grade ≥3                   | 35                 | 11      | 1.66              | 0.63–4.36  | 0.302      |         |
| Aspiration           | PC D <sub>mean</sub>       | <45 Gy (Reference) | 24      | 5                 |            |            |         |
|                      |                            | ≥45 Gy             | 48      | 20                | 2.71       | 0.86–8.48  | 0.086   |
|                      |                            | <50 Gy (Reference) | 34      | 9                 |            |            |         |
|                      |                            | ≥50 Gy             | 38      | 16                | 2.02       | 0.74–5.47  | 0.167   |
|                      |                            | <55 Gy (Reference) | 48      | 12                |            |            |         |
|                      |                            | ≥55 Gy             | 24      | 13                | 3.54       | 1.25–9.98  | 0.017   |
|                      | Larynx D <sub>mean</sub>   | <45 Gy (Reference) | 30      | 4                 |            |            |         |
|                      |                            | ≥45 Gy             | 42      | 21                | 6.5        | 1.93–21.88 | 0.003   |
|                      |                            | <50 Gy (Reference) | 40      | 10                |            |            |         |
|                      |                            | ≥50 Gy             | 32      | 15                | 2.64       | 0.97–7.17  | 0.056   |
|                      |                            | <55 Gy (Reference) | 49      | 11                |            |            |         |
|                      |                            | ≥55 Gy             | 23      | 14                | 5.37       | 1.83–15.71 | 0.002   |
| CE D <sub>mean</sub> | <45 Gy (Reference)         | 47                 | 14      |                   |            |            |         |
|                      | ≥45 Gy                     | 25                 | 11      | 1.85              | 0.67–5.07  | 0.230      |         |

|                  |                           |    |    |      |            |       |
|------------------|---------------------------|----|----|------|------------|-------|
|                  | <50 Gy (Reference)        | 60 | 21 |      |            |       |
|                  | ≥50 Gy                    | 12 | 4  | 0.92 | 0.24–3.44  | 0.912 |
|                  | <55 Gy (Reference)        | 67 | 22 |      |            |       |
|                  | ≥55 Gy                    | 5  | 3  | 3.06 | 0.47–19.71 | 0.238 |
| Late dysphagia   | <No dysphagia (Reference) | 45 | 10 |      |            |       |
|                  | ≥With dysphagia           | 27 | 15 | 4.37 | 1.55–12.31 | 0.005 |
| Treatment type   | Radical (Reference)       | 40 | 5  |      |            |       |
|                  | Adjuvant (post-operative) | 32 | 10 | 2.65 | 0.97–7.17  | 0.056 |
| Site             | Pharynx                   | 39 | 8  |      |            |       |
|                  | Others                    | 33 | 17 | 4.12 | 1.46–11.58 | 0.007 |
| Acute aspiration | Absent                    | 13 | 13 |      |            |       |
|                  | Present                   | 21 | 21 | 0.63 | 0.23–1.66  | 0.348 |

Logistic regression was used to correlate  $D_{\text{mean}}$  received by salivary glands and dysphagia aspiration-related structure with risk of developing xerostomia and dysphagia, respectively.

OAR, organ-at-risk; HR, hazard ratio; CI, confidence interval; SMGs, submandibular glands; PC, pharyngeal constrictor; CE, cervical esophagus.
