# Supplementary material for: Late toxicities in locally advanced head and neck squamous cell carcinoma treated with intensity modulated radiation therapy
Source: PubMed Central journal article supplement — Radiat Oncol J. 2021 Sep 13;39(3):184–92. doi: 10.3857/roj.2020.00913 (PMC8497871; doi:10.3857/roj.2020.00913), 2021-09-13
Supplement: roj-2020-00913-suppl2.pdf [file roj-2020-00913-suppl2.pdf]

**Table S2.** Cause of death

|                | <b>1st year</b>          | <b>2nd year</b>     | <b>3rd year</b> | <b>4th year</b>    | <b>5th year</b> | <b>6th year</b> |
|----------------|--------------------------|---------------------|-----------------|--------------------|-----------------|-----------------|
| Disease        | 18                       | 20                  | 5               | 4                  | 1               | 0               |
| Toxicity       | 12 (sepsis)              | 1 (AP)              | 2 (AP)          | 2 (AP 1, FoT 1)    | 0               | 0               |
| Others         | 3 (unknown 2, suicide 1) | 2 (MI 1, suicide 1) | 1 (CVA)         | 1 (second primary) | 1 (MI)          | 1 (COVID-19)    |
| Total (n = 74) | 33                       | 23                  | 8               | 7                  | 2               | 1               |

AP, aspiration pneumonia; FoT, failure to thrive; MI, myocardial infarction; CVA, cerebrovascular accident; COVID-19, coronavirus disease 2019.
